# Supplementary material for: Deletions in CWH43 cause idiopathic normal pressure hydrocephalus
Source: PubMed Central journal article supplement (PMC7933959; doi:10.15252/emmm.202013249), 2021-01-18

Figure 1D

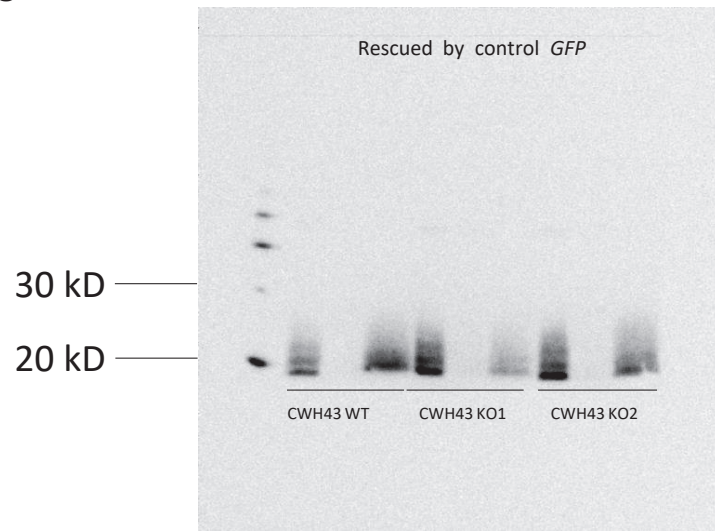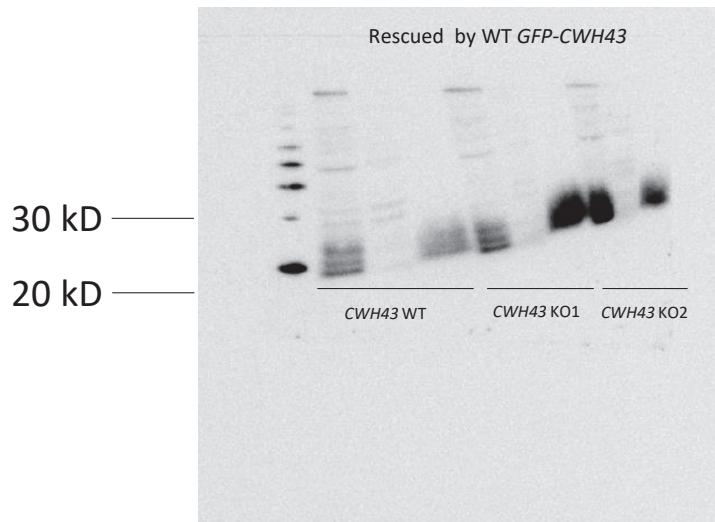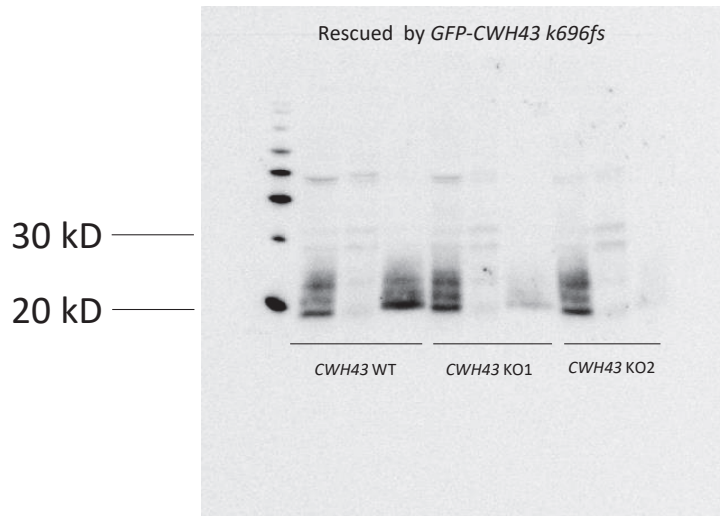

Supplement: EMMM-13-e13249-s002.pdf [file EMMM-13-e13249-s002.pdf]
