# Supplementary material for: Deletions in CWH43 cause idiopathic normal pressure hydrocephalus
Source: PubMed Central journal article supplement (PMC7933959; doi:10.15252/emmm.202013249), 2021-01-18

**Figure 4A**Ciliated cell number /1500 $\mu\text{m}^2$ 

|         | <i>CWH43</i> <sup>WT/WT</sup> | <i>CWH43</i> <sup>M533/M533</sup>                                  |
|---------|-------------------------------|--------------------------------------------------------------------|
|         | 19                            | 13                                                                 |
|         | 18                            | 15                                                                 |
|         | 17                            | 11                                                                 |
|         | 17                            | 14                                                                 |
| Average | 17.75                         | 13.25                                                              |
| STDEVA  | 0.957427108                   | 1.707825128                                                        |
| T.Test  |                               | <i>CWH43</i> <sup>WT/WT</sup> vs <i>CWH43</i> <sup>M533/M533</sup> |
| P Value |                               | 0.003704513                                                        |

Figure 4B

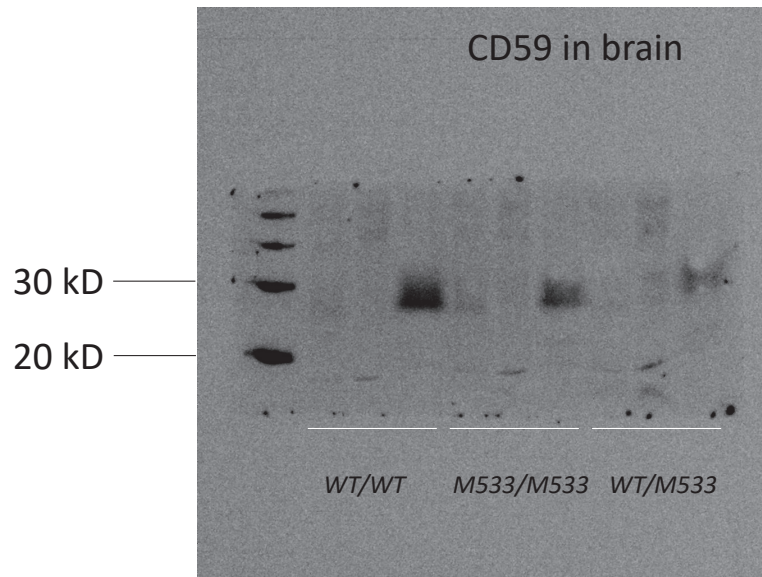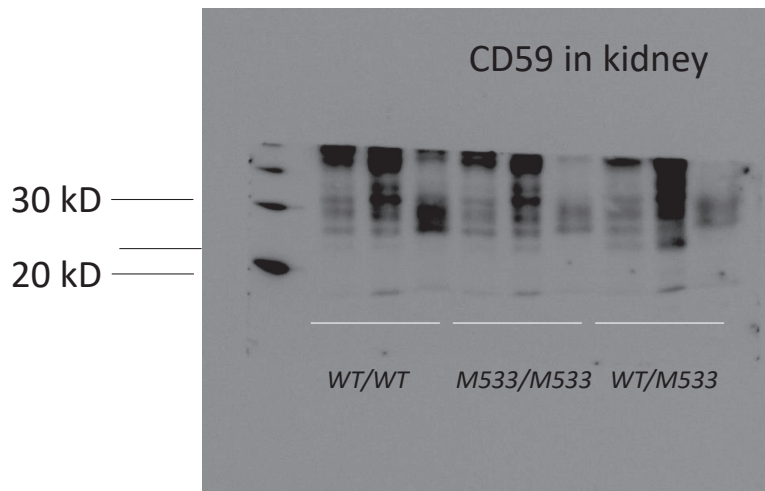

Supplement: EMMM-13-e13249-s004.pdf [file EMMM-13-e13249-s004.pdf]
